# Supplementary material
Source: ML conference proceedings conference paper supplement (https://openaccess.thecvf.com/content/CVPR2026/html/Tian_InternData-A1_Pioneering_High-Fidelity_CVPR_2026_paper.html)
Supplement: Supplementary file 1 [file Appendix.pdf › Supp/Appendix.pdf]

# InternData-A1: Pioneering High-Fidelity Synthetic Data for Pre-training Generalist Policy

## Supplementary Material

### 8. Detailed Data Statistics

We report the complete dataset statistics in Tab. 6. In total, the dataset contains **4** embodiments, **70** tasks, **637,498** trajectories, **401,430,981** frames, and **7,433.91** hours of interaction data. As outlined above, the dataset is organized into four categories: **Articulation**, **Long-horizon**, **Base**, and **Pick and Place**. These categories comprise **74,415**, **138,782**, **229,168**, and **195,133** trajectories, accounting for **11.67%**, **21.77%**, **35.95%**, and **30.61%** of the dataset, respectively. For each task, we report the exact number of trajectories contributed by each embodiment. See Tab. 6 for detailed per-task and per-embodiment statistics.

### 9. Detailed Data Synthesis

We present an example task config below. Following the exact task config, we elaborate on each part in our data synthesis in detail.

#### 9.1. Environment Construction

As shown in the configuration, we set the room environment using `defaults/arenas@arena` and select a dining-room layout in the outer script. We load the Agilex Split Aloha robot—one of our four embodiments—and specify its motion planner via the `robot_file`. We then retrieve two task-relevant assets, the plate and plate shelf, from our asset library, where each asset is automatically annotated with gravity parameters, collision properties, and grasp poses. After obtaining the two objects, we assign their initial translations and orientations. Objects belonging to the same category share a unified canonical pose definition.

#### 9.2. Skill Composition

As shown in the configuration—particularly in the `skills/split_aloha` section—we construct tasks by composing skills either sequentially or in parallel. Users can simply copy and paste different skill blocks to assemble a task. For example, a complete task may be formed by chaining together `pick`, `goto_pose`, `pick`, `gripper_action` (close or open), `home`, and `place`. The framework supports both sequential execution and parallel execution (e.g., one gripper opens while the other closes), enabling users to specify diverse task requirements. Users may also define task-level constraints; for instance, in a placement operation, we enforce `align_pick_obj_axis` and `align_place_obj_axis` to be parallel to ensure

accurate insertion. Similarly, `x_ratio_range` and `y_ratio_range` can be used to specify the target insertion layer. All script-level policies have undergone substantial refinement. For manual tuning, users may configure grasp-pose filtering rules (`filter_x_dir`, `filter_y_dir`, `filter_z_dir`) and adjust parameters such as `post_grasp_offset_min`, `post_grasp_offset_max`, `pre_place_z_offset`, and `place_z_offset` to ensure stable grasping and placement while avoiding unsafe motions.

#### 9.3. Domain Randomization

For visual domain randomization, we provide options in `env_map`, allowing light intensity and rotation to be perturbed within predefined ranges. We also support camera extrinsic randomization, where camera poses are perturbed by up to  $5^\circ$  in rotation and 5 cm in translation. Room scenes can be randomized by sampling from the specified room types. For objects, replacements can be sampled from assets within the same category. At the trajectory level, we define a spatial region in which target objects and robots are initialized with randomized poses for each episode. Additionally, the `robots` configuration allows specifying the mean and standard deviation of the home configuration, enabling diverse initial joint states. Within the skill definitions, we further introduce loose filtering ranges for grasp and placement poses. All poses that satisfy these constraints are retained, and a final pose is selected randomly. Together, these mechanisms significantly enhance trajectory diversity within each task.

#### 9.4. Generation & Storage

After the previous steps, our data engine begins planning the trajectory based on the waypoints produced by the skill module. We design an optimization strategy that improves generation efficiency by 2.5–3 $\times$ , particularly for long-horizon tasks involving multiple skills. Because rendering is significantly more time-consuming than physics-only planning, we adopt a decoupled procedure. We first run pure physics simulation without rendering; if any intermediate step fails, we immediately terminate and restart trajectory planning. Only after a trajectory is successfully planned do we replay the entire sequence with rendering enabled, ensuring that all object states are identical to those in the successful physics-only episode. This approach eliminates unnecessary rendering for failed attempts and greatly

reduces overhead in tasks with high failure rates, maximizing overall data-generation efficiency.

## 10. Framework Optimization

In traditional synthetic data generation pipelines, trajectory planning and visual rendering are integrated into a single stage. While this architecture is suitable for rapid development and iteration, it exhibits substantial efficiency bottlenecks when scaled to large-scale data generation. The root causes can be summarized as follows:

1. **Declining planning success rate with increasing task complexity.** As task complexity grows, the success rate of trajectory planning decreases significantly. Failed trajectories do not require subsequent visual rendering, yet the single-stage architecture incurs redundant rendering overhead, resulting in unnecessary computational waste.
2. **Mismatch in computational characteristics.** Trajectory planning is fundamentally CPU-bound and executed serially, whereas visual rendering relies on GPU-based parallel computation. Executing these heterogeneous workloads in a serial manner leads to poor overall hardware utilization.

To mitigate these bottlenecks, we introduce a multi-level system optimization at the framework level. Our design includes:

1. **Stage decoupling with a pipelined architecture:** Trajectory planning and visual rendering are decoupled into two independent stages, with a pipelined execution mechanism established between the Planner and Renderer.
2. **Dynamic resource scheduling:** To address heterogeneous time-cost ratios across different tasks, we incorporate parallel batch processing strategies within both the Planner and Renderer, together with a dynamic scheduling algorithm to maximize resource utilization.
3. **Rendering efficiency optimization:** We introduce a stacked rendering (Stack Render) technique to further increase rendering throughput.
4. **Cluster stability mechanisms:** To handle stability issues and load imbalance in large-scale cluster deployments, we design a *Balancer* module for load distribution and a *Supervisor* module for monitoring and control, jointly improving cluster utilization and system robustness.

With these optimizations, our pipeline achieves a 2–3× end-to-end performance improvement over the baseline. It further supports long-duration stable operation and efficient large-scale synthetic data generation, substantially improving productivity in synthetic data production.

## 11. Policy Training Details

During real-world training, we pretrain a new  $\pi_0$  model, initialized with Paligemma weights and a scratched action expert, on InternData-A1 for 680k iterations using 64 GPUs (closely matches the 700k iteration steps of the official  $\pi_0$  checkpoint trained on the  $\pi$ -dataset). For 10 sim-to-real experiments and 9 real-world tasks, we start from the 680k  $\pi_0$  (InternData-A1) checkpoint and perform post-training for 30k iterations on 8 GPUs for regular tasks and sim-to-real tasks. For dexterous tasks, we trained for 100k iterations. Key training hyperparameters are summarized in Tab. 5.

Table 5. Training hyperparameters.

| Hyperparameters        | Pre-training | Fine-tuning                  |
|------------------------|--------------|------------------------------|
| Batch Size(Total)      | 512          | 128                          |
| Learning Rate          | 5e-5         | 2.5e-5                       |
| Learning Rate Schedule | Constant     | Cosine Decay                 |
| Training Steps         | 680k         | 30k(Regular)/100k(Dexterous) |

## 12. Real-World Experiments

In this section, we describe the real-world and sim-to-real tasks in detail. For both experiments, we post-train a JAX-version  $\pi_0$  (InternData-A1) model for 30k iterations and use the 30k checkpoint for evaluation. For each task, we define 15 evaluation settings, and to reduce stochasticity, we run two trials per setting. In total, each task is evaluated with 30 rollouts, and we report the average success rate.

### 12.1. Real Task Description

**Place Markpen.** The Genie-1 robot is required to pick a black marker with its right arm and place it into a pen holder. This task evaluates the model’s fundamental pick-and-place capabilities. A trial is considered successful only if the marker is placed precisely and fully inside the pen holder.

**Pass Bottle.** The Genie-1 robot is required to pick up a black tea bottle, lift it upright, and hand it to a nearby person with the right arm. The robot may release its gripper only when the human presents their hand. This task evaluates the model’s fundamental abilities in picking, lifting, and human–robot interaction. A trial is considered successful only if the bottle is successfully transferred to the human and the robot releases its gripper accordingly.

**Heat Sandwich.** The ARX Lift-2 robot must open the oven with its left arm, pick up the plate containing the sandwich, place it into the oven using its right arm, and then close the oven with its left arm. This task assesses the model’s ability to operate articulated objects. A trial is considered successful only if the plate is correctly inserted into the

oven and the oven door is fully closed.

**Sort Rubbish.** The ARX Lift-2 robot must use its right arm to place all recyclable waste into the right bin and all non-recyclable waste into the left bin. This task evaluates the model's ability to handle diverse object layouts and perform repetitive pick-and-place operations. A trial is considered successful only if all waste items are fully and correctly sorted.

**Sweep Trash.** The ARX Lift-2 robot must grasp the dustpan with its right arm and the broom with its left arm. It then uses the broom to sweep all crumpled paper balls into the dustpan. Afterwards, the robot empties the dustpan into the left rubbish bin. Finally, it releases both grippers and returns to the home position. A trial is considered successful only if every step is finished successfully.

**Sort Parts.** The ARX Lift-2 robot must sort four types of small industrial components into four designated containers. These components include small nuts, assembly parts, and small screws. Each arm is responsible for sorting two categories. A trial is considered successful only if all components are placed into their correct containers.

**Unscrew Cap** The ARX AC One robot must grasp the tea bottle with its left arm and move it to the designated middle zone. It then uses its right arm to approach the bottle cap and unscrew it. A trial is considered successful only if the cap is fully removed.

**Fold Cloths.** The ARX AC One robot must fold the cloth into its designated final shape with both hands. A trial is considered successful only if the cloth is folded correctly.

**Zip Bag.** The ARX AC One robot must use its left arm to open the bag, place all designated objects inside, and then zip it closed. A trial is considered successful only if the bag is fully and correctly zipped.

## 12.2. Sim-to-real Task Description

**Flip Package.** A package is placed on the conveyor and moves toward the robot. The ARX Lift-2 robot must grasp the package with its right arm, flip it over, and place it back onto the conveyor. It must then grasp the package with its left arm and scan the QR code using the robot-mounted camera. A trial is considered successful only if all steps are completed correctly.

**Instructional Pick.** Eight types of objects are placed on the table. A trial is considered successful only if the robot correctly picks the target object specified by the command.

**Sort Rubbish.** This is the same task as described before.

**Wipe Stain.** The ARX Lift-2 robot uses its left arm to pick up the towel and wipe stains located in one or two clusters. A trial is considered successful only if all stains are completely removed.

**Sandwich.** The ARX Lift-2 robot uses its right arm to grasp a piece of bread and place it on the plate. It then uses its left

arm to grasp a piece of beef and place it on the bread, followed by using the right arm again to place another piece of bread on top of the beef. A trial is considered successful only if the sandwich is assembled correctly and neatly.

**Box.** The ARX Lift-2 robot sequentially closes the box lids with its right and left arms. A trial is considered successful upon complete closure.

**Microwave.** The ARX Lift-2 robot uses the right arm to close the microwave lid. A trial is considered successful upon complete closure.

**Pack.** The ARX Lift-2 robot manipulates objects and places them into a box using its right and left arms. A trial is considered successful only after all objects have been placed inside.

**Sweep.** This is the same task as described before.

**Handover.** The ARX Lift-2 robot uses its left arm to pick up a long-shaped object and hands it over to the right arm, which then places it into the box. A trial is considered successful only upon the object's transfer into the box.

Table 6. Task Statistics Across Robots.

| Task Name                          | Franka | ARX Lift-2 | Agilex Split Aloha | Genie-1 | Sum            |
|------------------------------------|--------|------------|--------------------|---------|----------------|
| <b>Articulation Tasks (11.67%)</b> |        |            |                    |         | <b>74,415</b>  |
| Close The Electric Cooker          | 1776   |            |                    |         |                |
| Close The Laptop                   | 578    |            |                    |         |                |
| Close The Pot                      | 2595   |            |                    |         |                |
| Close The Trashcan                 | 2996   |            |                    |         |                |
| Close The Microwave                | 2496   | 6831       | 4367               |         |                |
| Open The Laptop                    | 416    |            |                    |         |                |
| Open The Pot                       | 3250   |            |                    |         |                |
| Open The Trashcan                  | 3507   |            |                    |         |                |
| Open The Microwave                 | 2139   | 5148       | 4817               |         |                |
| Pull The Storage Furniture         |        | 4368       | 4776               |         |                |
| Push The Storage Furniture         |        | 4548       | 4775               |         |                |
| Rotate The Hearth                  |        | 6046       | 4653               |         |                |
| Open Microwave From Scratch        |        |            | 1501               |         |                |
| Heat Food In Microwave             |        | 108        |                    |         |                |
| Close The Package                  |        | 2724       |                    |         |                |
| <b>Long-horizon Tasks (21.77%)</b> |        |            |                    |         | <b>138,782</b> |
| Clean Dirt With Brown Cloth        |        | 3000       | 3000               |         |                |
| Clean Dirt With Sponge             |        | 3000       | 3000               |         |                |
| Clean Dirt With White Cloth        |        | 3000       | 3000               |         |                |
| Collect Three Glues                |        | 2000       | 2000               |         |                |
| Gather Three Teaboxes              |        | 110        | 2000               |         |                |
| Handover Objects                   |        | 7863       |                    |         |                |
| Pack In Objects                    |        | 4052       | 2345               |         |                |
| Pack Out Objects                   |        |            | 2070               |         |                |
| Sort The Rubbish                   |        | 4579       | 8860               |         |                |
| Stack Multiple Objects             |        | 4867       | 4664               |         |                |
| Sweep The Trash                    | 2344   | 528        | 1626               |         |                |
| Put Trash In Trashcan              | 1480   |            |                    |         |                |
| Collaborate Assemble Beef Sandwich |        | 4854       |                    |         |                |
| Stack A Beef Sandwich              |        | 4271       | 670                |         |                |
| Store Objects In Drawer            |        | 2822       |                    |         |                |
| Collaborate Assemble Ham Sandwich  |        | 3168       |                    |         |                |
| Continues Pick And Place           | 20036  | 15000      | 18573              |         |                |
| <b>Base Tasks (35.95%)</b>         |        |            |                    |         | <b>229,168</b> |
| Track The Target                   | 2959   | 2954       | 3000               |         |                |
| Organize Three Brushes             | 5064   | 2000       | 2000               |         |                |
| Organize Alarm Clocks              | 5111   | 2000       | 2000               |         |                |
| Organize Colorful Cups             | 5097   | 2000       | 2000               |         |                |
| Organize Three Glues               | 5120   |            |                    |         |                |
| Collect Shoes                      | 5114   | 2000       | 2000               |         |                |
| Organize Three Teaboxes            | 5119   |            |                    |         |                |
| Sort Table Waste                   | 5117   | 214        | 2000               |         |                |
| Store Eggs                         |        |            |                    | 4244    |                |
| Take Shelf Items To Cart           |        |            |                    | 6040    |                |
| Pick Beef Sandwich On Conveyor     |        | 6658       | 6647               |         |                |

Continued on next page

| Task Name                            | Franka | ARX Lift-2 | Agilex Split Aloha | Genie-1 | Sum                |
|--------------------------------------|--------|------------|--------------------|---------|--------------------|
| Pick Ham Sandwich On Conveyor        |        | 4092       | 4220               |         |                    |
| Fold Long Shirts                     |        | 731        |                    |         |                    |
| Fold Short Shirts                    |        | 492        |                    |         |                    |
| Fold Towels                          |        | 500        |                    |         |                    |
| Fold Short Pants                     |        | 750        |                    |         |                    |
| Flip Package On Conveyor             |        | 4806       |                    |         |                    |
| Pick Package On Conveyor             |        | 4900       |                    |         |                    |
| Hang Cups On Rack                    |        | 5000       | 5000               |         |                    |
| Insert Flower In Vase                |        | 5000       | 4986               |         |                    |
| Insert Markpen In Penholder          |        | 5000       | 5000               |         |                    |
| Pour Baijiu                          |        | 4999       | 4999               |         |                    |
| Pour Redwine                         |        | 5000       | 5000               |         |                    |
| Pour Water                           |        | 5000       | 5000               |         |                    |
| Pick The Priced Item                 | 5105   | 2000       | 2000               |         |                    |
| Select A Drink                       | 5121   | 2000       | 2000               |         |                    |
| Stack Two Boxes                      |        | 2270       | 2429               |         |                    |
| Sort Tray On Rack                    |        | 3851       | 3444               |         |                    |
| Store Toothbrushes                   |        | 1396       |                    |         |                    |
| Arrange The Tableware                |        | 650        |                    |         |                    |
| Recovery Pick Objects                |        | 10969      |                    |         |                    |
| Watering Plants                      |        | 5000       | 5000               |         |                    |
| Scan The QRcode                      |        |            |                    | 4000    |                    |
| Sort Metallic Objects                |        | 2500       | 2500               |         |                    |
| <b>Pick and Place Tasks (30.61%)</b> |        |            |                    |         | <b>195,133</b>     |
| Single Arm Pick                      | 24598  | 38865      | 39219              | 21695   |                    |
| Parallel Pick And Place              |        | 15687      | 18497              | 10381   |                    |
| Grasp Functional Part                |        |            |                    | 4833    |                    |
| Multiple Pick And Place              | 21358  |            |                    |         |                    |
| <b>Overall Trajectories</b>          |        |            |                    |         | <b>637,498</b>     |
| <b>Overall Frames</b>                |        |            |                    |         | <b>401,430,981</b> |
| <b>Overall Hours</b>                 |        |            |                    |         | <b>7433.91</b>     |

```
943 1 defaults:
944 2   - _self_
945 3   - world
946 4   - logger
947 5   - ../arenas@arena: scene_arena
948 6   - ../cameras@astra: astra
949 7   - ../cameras@realsense_d455_v3: realsense_d455_v3
950 8
951 9 name: banana_base_task
952 10 asset_root: assets
953 11 task: BananaBaseTask
954 12 task_id: 0
955 13
956 14 offset: null
957 15 render: True
958 16
959 17 env_map:
960 18   envmap_lib: envmap_lib
961 19   apply_randomization: True
962 20   intensity_range: [4000, 7000]
963 21   rotation_range: [0, 180]
964 22
965 23 robots:
966 24   -
967 25     name: "split_aloha"
968 26     target_class: SplitAloha
969 27     path: "split_aloha_mid_360/robot_task13.usd"
970 28     camera_mount: "split_aloha_mid_360_with_piper/split_aloha_mid_360_with_piper/fl/camera"
971 29     euler: [0.0, 0.0, 90.0]
972 30     robot_file:
973 31       - curobo/src/curobo/content/configs/robot/piper100_left_arm.yml
974 32       - curobo/src/curobo/content/configs/robot/piper100_right_arm.yml
975 33     left_joint_home: [0.00484993, 0.34198609, -0.14007858, 0.01680429, 0.14391101, -0.00252178]
976 34     right_joint_home: [0.00484993, 0.34198609, -0.14007858, 0.01680429, 0.14391101, -0.00252178]
977 35     left_joint_home_std: [0.12513939, 0.24539099, 0.24468172, 0.23398885, 0.2710117, 0.21726329]
978 36     right_joint_home_std: [0.12513939, 0.24539099, 0.24468172, 0.23398885, 0.2710117, 0.21726329]
979 37
980 38 objects:
981 39   -
982 40     name: arcode_plate_blue
983 41     path: assets/plate/plate_blue/Aligned_obj.usd
984 42     target_class: RigidBody
985 43     dataset: arcode
986 44     category: plate
987 45     prim_path_child: Aligned
988 46     translation: [0.0, 0.0, 0.0]
989 47     euler: [90.0, 0.0, 0.0]
990 48     scale: [1.0, 1.0, 1.0]
991 49   -
992 50     name: arcode_plate_shelf
993 51     path: assets/plate_shelf/shelf_0/Aligned_obj.usd
994 52     target_class: RigidBody
995 53     dataset: arcode
996 54     category: plate
997 55     prim_path_child: Aligned
998 56     translation: [0.0, 0.0, 0.0]
999 57     euler: [90.0, 0.0, 0.0]
1000 58     scale: [1.0, 1.0, 1.0]
1001 59
1002 60 regions:
1003 61   -
1004 62     object: ${robots.0.name}
1005 63     target: table
1006 64     random_type: A_on_B_region_sampler
1007 65     random_config:
1008 66       pos_range: [
```

```
67         [0.0, -0.86, -0.765],
68         [0.0, -0.86, -0.765]
69     ]
70     yaw_rotation: [0.0, 0.0]
71 -
72     object: arcode_plate_blue
73     target: table
74     random_type: A_on_B_region_sampler
75     random_config:
76         pos_range: [
77             [0.125, -0.20, 0.005],
78             [0.25, -0.10, 0.005]
79         ]
80         yaw_rotation: [0, 0]
81 -
82     object: arcode_plate_shelf
83     target: table
84     random_type: A_on_B_region_sampler
85     random_config:
86         pos_range: [
87             [-0.25, -0.20, 0.005],
88             [-0.15, -0.10, 0.005]
89         ]
90         yaw_rotation: [0, 0]
91
92 cameras:
93 -
94     name: ${robots.0.name}_hand_left
95     translation: [0.0, 0.08, 0.05]
96     orientation: [0.0, 0.0, 0.965, 0.259]
97     camera_axes: usd
98     params: ${astra}
99     parent: "${robots.0.name}/split_aloha_mid_360_with_piper/fl/link6"
100     apply_randomization: False
101
102 -
103     name: ${robots.0.name}_hand_right
104     translation: [0.0, 0.08, 0.04]
105     orientation: [0.0, 0.0, 0.972, 0.233]
106     camera_axes: usd
107     params: ${astra}
108     parent: "${robots.0.name}/split_aloha_mid_360_with_piper/fr/link6"
109     apply_randomization: False
110
111 -
112     name: ${robots.0.name}_head
113     translation: [0.0, -0.00818, 0.1]
114     orientation: [0.658, 0.259, -0.282, -0.648]
115     camera_axes: usd
116     params: ${realsense_d455_v3}
117     parent: "${robots.0.name}/split_aloha_mid_360_with_piper/top_camera_link"
118     apply_randomization: False
119
120 data:
121     save_root_path: "InternData-A1/sim/raw_data"
122     task_dir: "Sort Tray On Rack"
123     language_instruction: "Pick the plate, make the handover and place it on the water cooling holder"
124     detailed_language_instruction: "Pick the plate with the right arm, make the handover to the left
125         arm, and then place it on the water cooling holder."
126     collect_info: ""
127     version: "v3.0, head camera 1280x720, wrist 640x480, y 45 degrees"
128     update: True
129     max_episode_length: 4000
130
131 skills:
132 -
133     split_aloha:
```

1010  
1011  
1012  
1013  
1014  
1015  
1016  
1017  
1018  
1019  
1020  
1021  
1022  
1023  
1024  
1025  
1026  
1027  
1028  
1029  
1030  
1031  
1032  
1033  
1034  
1035  
1036  
1037  
1038  
1039  
1040  
1041  
1042  
1043  
1044  
1045  
1046  
1047  
1048  
1049  
1050  
1051  
1052  
1053  
1054  
1055  
1056  
1057  
1058  
1059  
1060  
1061  
1062  
1063  
1064  
1065  
1066  
1067  
1068  
1069  
1070  
1071  
1072  
1073  
1074  
1075  
1076



```

1077 133 -
1078 134   right:
1079 135     -
1080 136       name: pick
1081 137       objects: [arcodes_plate_blue]
1082 138       filter_x_dir: ["upward", 90, 45]
1083 139       filter_y_dir: ["forward", 40]
1084 140       filter_z_dir: ["downward", 110, 140]
1085 141       t_eps: 0.01
1086 142       o_eps: 1
1087 143       close_wait_steps: 10
1088 144       post_grasp_offset_min: 0.1
1089 145       post_grasp_offset_max: 0.1
1090 146       direction_to_obj: right
1091 147
1092 148     -
1093 149       name: goto__pose
1094 150       frame: robot
1095 151       gripper_action: close_gripper
1096 152       translation: [0.3, 0.13, 0.15]
1097 153       quaternion: [-0.15, -0.37, -0.84, -0.36]
1098 154
1099 155 -
1100 156   left:
1101 157     -
1102 158       name: pick
1103 159       objects: [arcodes_plate_blue]
1104 160       filter_y_dir: ["upward", 40]
1105 161       filter_z_dir: ["forward", 90, 45]
1106 162       close_wait_steps: 10
1107 163       t_eps: 0.01
1108 164       o_eps: 1
1109 165       post_grasp_offset_min: 0.0
1110 166       post_grasp_offset_max: 0.0
1111 167       direction_to_obj: left
1112 168
1113 169 -
1114 170   left:
1115 171     - name: gripper__action
1116 172       action_type: close
1117 173   right:
1118 174     - name: gripper__action
1119 175       action_type: open
1120 176
1121 177 -
1122 178   right:
1123 179     - name: home
1124 180
1125 181 -
1126 182   left:
1127 183     -
1128 184       name: place
1129 185       place_direction: vertical
1130 186       objects: [arcodes_plate_blue, arcodes_plate_shelf]
1131 187       filter_y_dir: ["upward", 60, 0]
1132 188       filter_z_dir: ["forward", 90, 30]
1133 189       position_constraint: object
1134 190       x_ratio_range: [0.5, 0.5]
1135 191       y_ratio_range: [0.8, 0.8]
1136 192       align_pick_obj_axis: [0, 1, 0]
1137 193       align_place_obj_axis: [0, 0, 1]
1138 194       align_obj_tol: 10
1139 195       pre_place_z_offset: 0.15
1140 196       place_z_offset: 0.01

```

Listing 1. A Task Config Example on Sort Tray On Rack.



## References

- [1] Lucas Beyer, Andreas Steiner, André Susano Pinto, Alexander Kolesnikov, Xiao Wang, Daniel Salz, Maxim Neumann, Ibrahim Alabdulmohsin, Michael Tschannen, Emanuele Bugliarello, et al. Paligemma: A versatile 3b vlm for transfer. In *ArXiv*, 2024. 6
- [2] Johan Bjorck, Fernando Castañeda, Nikita Cherniadev, Xingye Da, Runyu Ding, Linxi Fan, Yu Fang, Dieter Fox, Fengyuan Hu, Spencer Huang, et al. Gr00t n1: An open foundation model for generalist humanoid robots. In *ArXiv*, 2025. 2, 3
- [3] Kevin Black, Noah Brown, Danny Driess, Adnan Esmail, Michael Equi, Chelsea Finn, Niccolo Fusai, Lachy Groom, Karol Hausman, Brian Ichter, et al.  $\pi_0$ : A vision-language-action flow model for general robot control. In *RSS*, 2024. 2, 3
- [4] Anthony Brohan, Noah Brown, Justice Carbajal, Yevgen Chebotar, Joseph Dabis, Chelsea Finn, Keerthana Gopalakrishnan, Karol Hausman, Alex Herzog, Jasmine Hsu, et al. Rt-1: Robotics transformer for real-world control at scale. In *ArXiv*, 2022. 3
- [5] Qingwen Bu, Jisong Cai, Li Chen, Xiuqi Cui, Yan Ding, Siyuan Feng, Shenyuan Gao, Xindong He, Xuan Hu, Xu Huang, et al. Agibot world colosseum: A large-scale manipulation platform for scalable and intelligent embodied systems. In *IROS*, 2025. 2, 3, 7
- [6] Qingwen Bu, Yanting Yang, Jisong Cai, Shenyuan Gao, Guanghui Ren, Maoqing Yao, Ping Luo, and Hongyang Li. Univla: Learning to act anywhere with task-centric latent actions. In *RSS*, 2025. 3
- [7] Chilam Cheang, Sijin Chen, Zhongren Cui, Yingdong Hu, Liqun Huang, Tao Kong, Hang Li, Yifeng Li, Yuxiao Liu, Xiao Ma, et al. Gr-3 technical report. In *ArXiv*, 2025. 3
- [8] Chi-Lam Cheang, Guangzeng Chen, Ya Jing, Tao Kong, Hang Li, Yifeng Li, Yuxiao Liu, Hongtao Wu, Jiafeng Xu, Yichu Yang, et al. Gr-2: A generative video-language-action model with web-scale knowledge for robot manipulation. In *ArXiv*, 2024. 3
- [9] Anka He Chen, Ziheng Liu, Yin Yang, and Cem Yuksel. Vertex block descent. In *TOG*, 2024. 5
- [10] Tianxing Chen, Zanxin Chen, Baijun Chen, Zijian Cai, Yibin Liu, Zixuan Li, Qiwei Liang, Xianliang Lin, Yiheng Ge, Zhenyu Gu, et al. Robotwin 2.0: A scalable data generator and benchmark with strong domain randomization for robust bimanual robotic manipulation. In *ArXiv*, 2025. 2, 3, 4, 6
- [11] Xinyi Chen, Yilun Chen, Yanwei Fu, Ning Gao, Jiaya Jia, Weiyang Jin, Hao Li, Yao Mu, Jiangmiao Pang, Yu Qiao, et al. Internvla-m1: A spatially guided vision-language-action framework for generalist robot policy. In *ArXiv*, 2025. 2, 3, 8
- [12] Can Cui, Pengxiang Ding, Wenxuan Song, Shuanghao Bai, Xinyang Tong, Zirui Ge, Runze Suo, Wanqi Zhou, Yang Liu, Bofang Jia, et al. Openhelix: A short survey, empirical analysis, and open-source dual-system vla model for robotic manipulation. In *ArXiv*, 2025. 8
- [13] Matt Deitke, Dustin Schwenk, Jordi Salvador, Luca Weihs, Oscar Michel, Eli VanderBilt, Ludwig Schmidt, Kiana Ehsani, Aniruddha Kembhavi, and Ali Farhadi. Objaverse: A universe of annotated 3d objects. In *CVPR*, 2023. 4
- [14] Shengliang Deng, Mi Yan, Songlin Wei, Haixin Ma, Yuxin Yang, Jiayi Chen, Zhiqi Zhang, Taoyu Yang, Xuheng Zhang, Wenhao Zhang, et al. Graspvla: a grasping foundation model pre-trained on billion-scale synthetic action data. In *ArXiv*, 2024. 2, 3, 8
- [15] Hao-Shu Fang, Chenxi Wang, Hongjie Fang, Minghao Gou, Jirong Liu, Hengxu Yan, Wenhai Liu, Yichen Xie, and Cewu Lu. Anygrasp: Robust and efficient grasp perception in spatial and temporal domains. In *TRO*, 2023. 4, 5
- [16] Haoran Geng, Helin Xu, Chengyang Zhao, Chao Xu, Li Yi, Siyuan Huang, and He Wang. Gapartnet: Cross-category domain-generalizable object perception and manipulation via generalizable and actionable parts. In *CVPR*, 2023. 4
- [17] Jiayuan Gu, Fanbo Xiang, Xuanlin Li, Zhan Ling, Xiqiang Liu, Tongzhou Mu, Yihe Tang, Stone Tao, Xinyue Wei, Yunchao Yao, et al. Maniskill2: A unified benchmark for generalizable manipulation skills. In *ArXiv*, 2023. 2
- [18] Pu Hua, Minghuan Liu, Annabella Macaluso, Yunfeng Lin, Weinan Zhang, Huazhe Xu, and Lirui Wang. Gensim2: Scaling robot data generation with multi-modal and reasoning llms. In *ArXiv*, 2024. 4
- [19] Physical Intelligence, Kevin Black, Noah Brown, James Darpinian, Karan Dhabalia, Danny Driess, Adnan Esmail, Michael Equi, Chelsea Finn, Niccolo Fusai, et al.  $\pi_{0.5}$ : a vision-language-action model with open-world generalization. In *CORL*, 2025. 2, 3
- [20] Stephen James, Zicong Ma, David Rovick Arrojo, and Andrew J Davison. Rlbenc: The robot learning benchmark & learning environment. In *RAL*, 2020. 2, 4
- [21] Tao Jiang, Tianyuan Yuan, Yicheng Liu, Chenhao Lu, Jianning Cui, Xiao Liu, Shuiqi Cheng, Jiyang Gao, Huazhe Xu, and Hang Zhao. Galaxia open-world dataset and g0 dual-system vla model. In *ArXiv*, 2025. 3
- [22] Zhao Jin, Zhengping Che, Zhen Zhao, Kun Wu, Yuheng Zhang, YINUO Zhao, Zehui Liu, Qiang Zhang, Xiaozhu Ju, Jing Tian, et al. Artvip: Articulated digital assets of visual realism, modular interaction, and physical fidelity for robot learning. In *ArXiv*, 2025. 4
- [23] Alexander Khazatsky, Karl Pertsch, Suraj Nair, Ashwin Balakrishna, Sudeep Dasari, Siddharth Karamcheti, Soroush Nasiriany, Mohan Kumar Srirama, Lawrence Yunliang Chen, Kirsty Ellis, et al. Droid: A large-scale in-the-wild robot manipulation dataset. In *RSS*, 2024. 3
- [24] Moo Jin Kim, Karl Pertsch, Siddharth Karamcheti, Ted Xiao, Ashwin Balakrishna, Suraj Nair, Rafael Rafailov, Ethan Foster, Grace Lam, Pannag Sanketi, et al. Openvla: An open-source vision-language-action model. In *CORL*, 2024. 3
- [25] Hao Li, Shuai Yang, Yilun Chen, Yang Tian, Xiaoda Yang, Xinyi Chen, Hanqing Wang, Tai Wang, Feng Zhao, Dahua Lin, et al. Cronusvla: Transferring latent motion across time for multi-frame prediction in manipulation. In *AAAI*, 2025. 2
- [26] Xinyu Lian, Zichao Yu, Ruiming Liang, Yitong Wang, Li Ray Luo, Kaixu Chen, Yuanzhen Zhou, Qihong Tang, Xudong Xu, Zhaoyang Lyu, et al. Infinite mobility: Scalable

- high-fidelity synthesis of articulated objects via procedural generation. In *ArXiv*, 2025. 4
- [27] Bo Liu, Yifeng Zhu, Chongkai Gao, Yihao Feng, Qiang Liu, Yuke Zhu, and Peter Stone. Libero: Benchmarking knowledge transfer for lifelong robot learning. In *NIPS*, 2023. 2
- [28] Ajay Mandlekar, Soroush Nasiriany, Bowen Wen, Iretiayo Akinola, Yashraj Narang, Linxi Fan, Yuke Zhu, and Dieter Fox. Mimicgen: A data generation system for scalable robot learning using human demonstrations. In *ArXiv*, 2023. 2
- [29] Oier Mees, Lukas Hermann, Erick Rosete-Beas, and Wolfram Burgard. Calvin: A benchmark for language-conditioned policy learning for long-horizon robot manipulation tasks. In *RAL*, 2022. 2, 3, 4
- [30] Soroush Nasiriany, Abhiram Maddukuri, Lance Zhang, Adeet Parikh, Aaron Lo, Abhishek Joshi, Ajay Mandlekar, and Yuke Zhu. Robocasa: Large-scale simulation of everyday tasks for generalist robots. In *CVPR*, 2024. 2, 3, 4, 7
- [31] Abby O'Neill, Abdul Rehman, Abhiram Maddukuri, Abhishek Gupta, Abhishek Padalkar, Abraham Lee, Acorn Pooley, Agrim Gupta, Ajay Mandlekar, Ajinkya Jain, et al. Open x-embodiment: Robotic learning datasets and rt-x models: Open x-embodiment collaboration 0. In *ICRA*, 2024. 2, 3, 7
- [32] Delin Qu, Haoming Song, Qizhi Chen, Zhaoqing Chen, Xianqiang Gao, Xinyi Ye, Qi Lv, Modi Shi, Guanghui Ren, Cheng Ruan, et al. Eo-1: Interleaved vision-text-action pre-training for general robot control. In *ArXiv*, 2025. 3
- [33] Balakumar Sundaralingam, Siva Kumar Sastry Hari, Adam Fishman, Caelan Garrett, Karl Van Wyk, Valts Blukis, Alexander Millane, Helen Oleynikova, Ankur Handa, Fabio Ramos, Nathan Ratliff, and Dieter Fox. curobo: Parallelized collision-free minimum-jerk robot motion generation, 2023. 4, 5
- [34] Yang Tian, Sizhe Yang, Jia Zeng, Ping Wang, Dahua Lin, Hao Dong, and Jiangmiao Pang. Predictive inverse dynamics models are scalable learners for robotic manipulation. In *ICLR*, 2025. 3
- [35] Homer Rich Walke, Kevin Black, Tony Z Zhao, Quan Vuong, Chongyi Zheng, Philippe Hansen-Estruch, Andre Wang He, Vivek Myers, Moo Jin Kim, Max Du, et al. Bridgedata v2: A dataset for robot learning at scale. In *CORL*, 2023. 3
- [36] Hanqing Wang, Jiahe Chen, Wensi Huang, Qingwei Ben, Tai Wang, Boyu Mi, Tao Huang, Siheng Zhao, Yilun Chen, Sizhe Yang, et al. Grutopia: Dream general robots in a city at scale. In *ArXiv*, 2024. 4
- [37] Kun Wu, Chengkai Hou, Jiaming Liu, Zhengping Che, Xiaozhu Ju, Zhuqin Yang, Meng Li, YINUO Zhao, Zhiyuan Xu, Guang Yang, et al. Robomind: Benchmark on multi-embodiment intelligence normative data for robot manipulation. In *RSS*, 2024. 3
- [38] Tong Wu, Jiarui Zhang, Xiao Fu, Yuxin Wang, Jiawei Ren, Liang Pan, Wayne Wu, Lei Yang, Jiaqi Wang, Chen Qian, et al. Omniobject3d: Large-vocabulary 3d object dataset for realistic perception, reconstruction and generation. In *CVPR*, 2023. 4
- [39] Shuai Yang, Hao Li, Yilun Chen, Bin Wang, Yang Tian, Tai Wang, Hanqing Wang, Feng Zhao, Yiyi Liao, and Jiangmiao Pang. Instructvla: Vision-language-action instruction tuning from understanding to manipulation. In *ArXiv*, 2025. 3
- [40] Yuyin Yang, Zetao Cai, Yang Tian, Jia Zeng, and Jiangmiao Pang. Gripper keypose and object pointflow as interfaces for bimanual robotic manipulation. In *RSS*, 2025. 3
- [41] Andy Zhai, Brae Liu, Bruno Fang, Chalse Cai, Ellie Ma, Ethan Yin, Hao Wang, Hugo Zhou, James Wang, Lights Shi, et al. Igniting vlms toward the embodied space. In *ArXiv*, 2025. 3
- [42] Jinliang Zheng, Jianxiong Li, Zhihao Wang, Dongxiu Liu, Xirui Kang, Yuchun Feng, Yinan Zheng, Jiayin Zou, Yilun Chen, Jia Zeng, et al. X-vla: Soft-prompted transformer as scalable cross-embodiment vision-language-action model. In *ArXiv*, 2025. 3
- [43] Brianna Zitkovich, Tianhe Yu, Sichun Xu, Peng Xu, Ted Xiao, Fei Xia, Jialin Wu, Paul Wohlhart, Stefan Welker, Ayzaan Wahid, et al. Rt-2: Vision-language-action models transfer web knowledge to robotic control. In *CORL*, 2023. 3
